# Supplementary material
Source: publisher figshare collection journal article supplement (https://tandf.figshare.com/ndownloader/files/13192523)
Supplement: Supplementary file 1 [file 13192523]

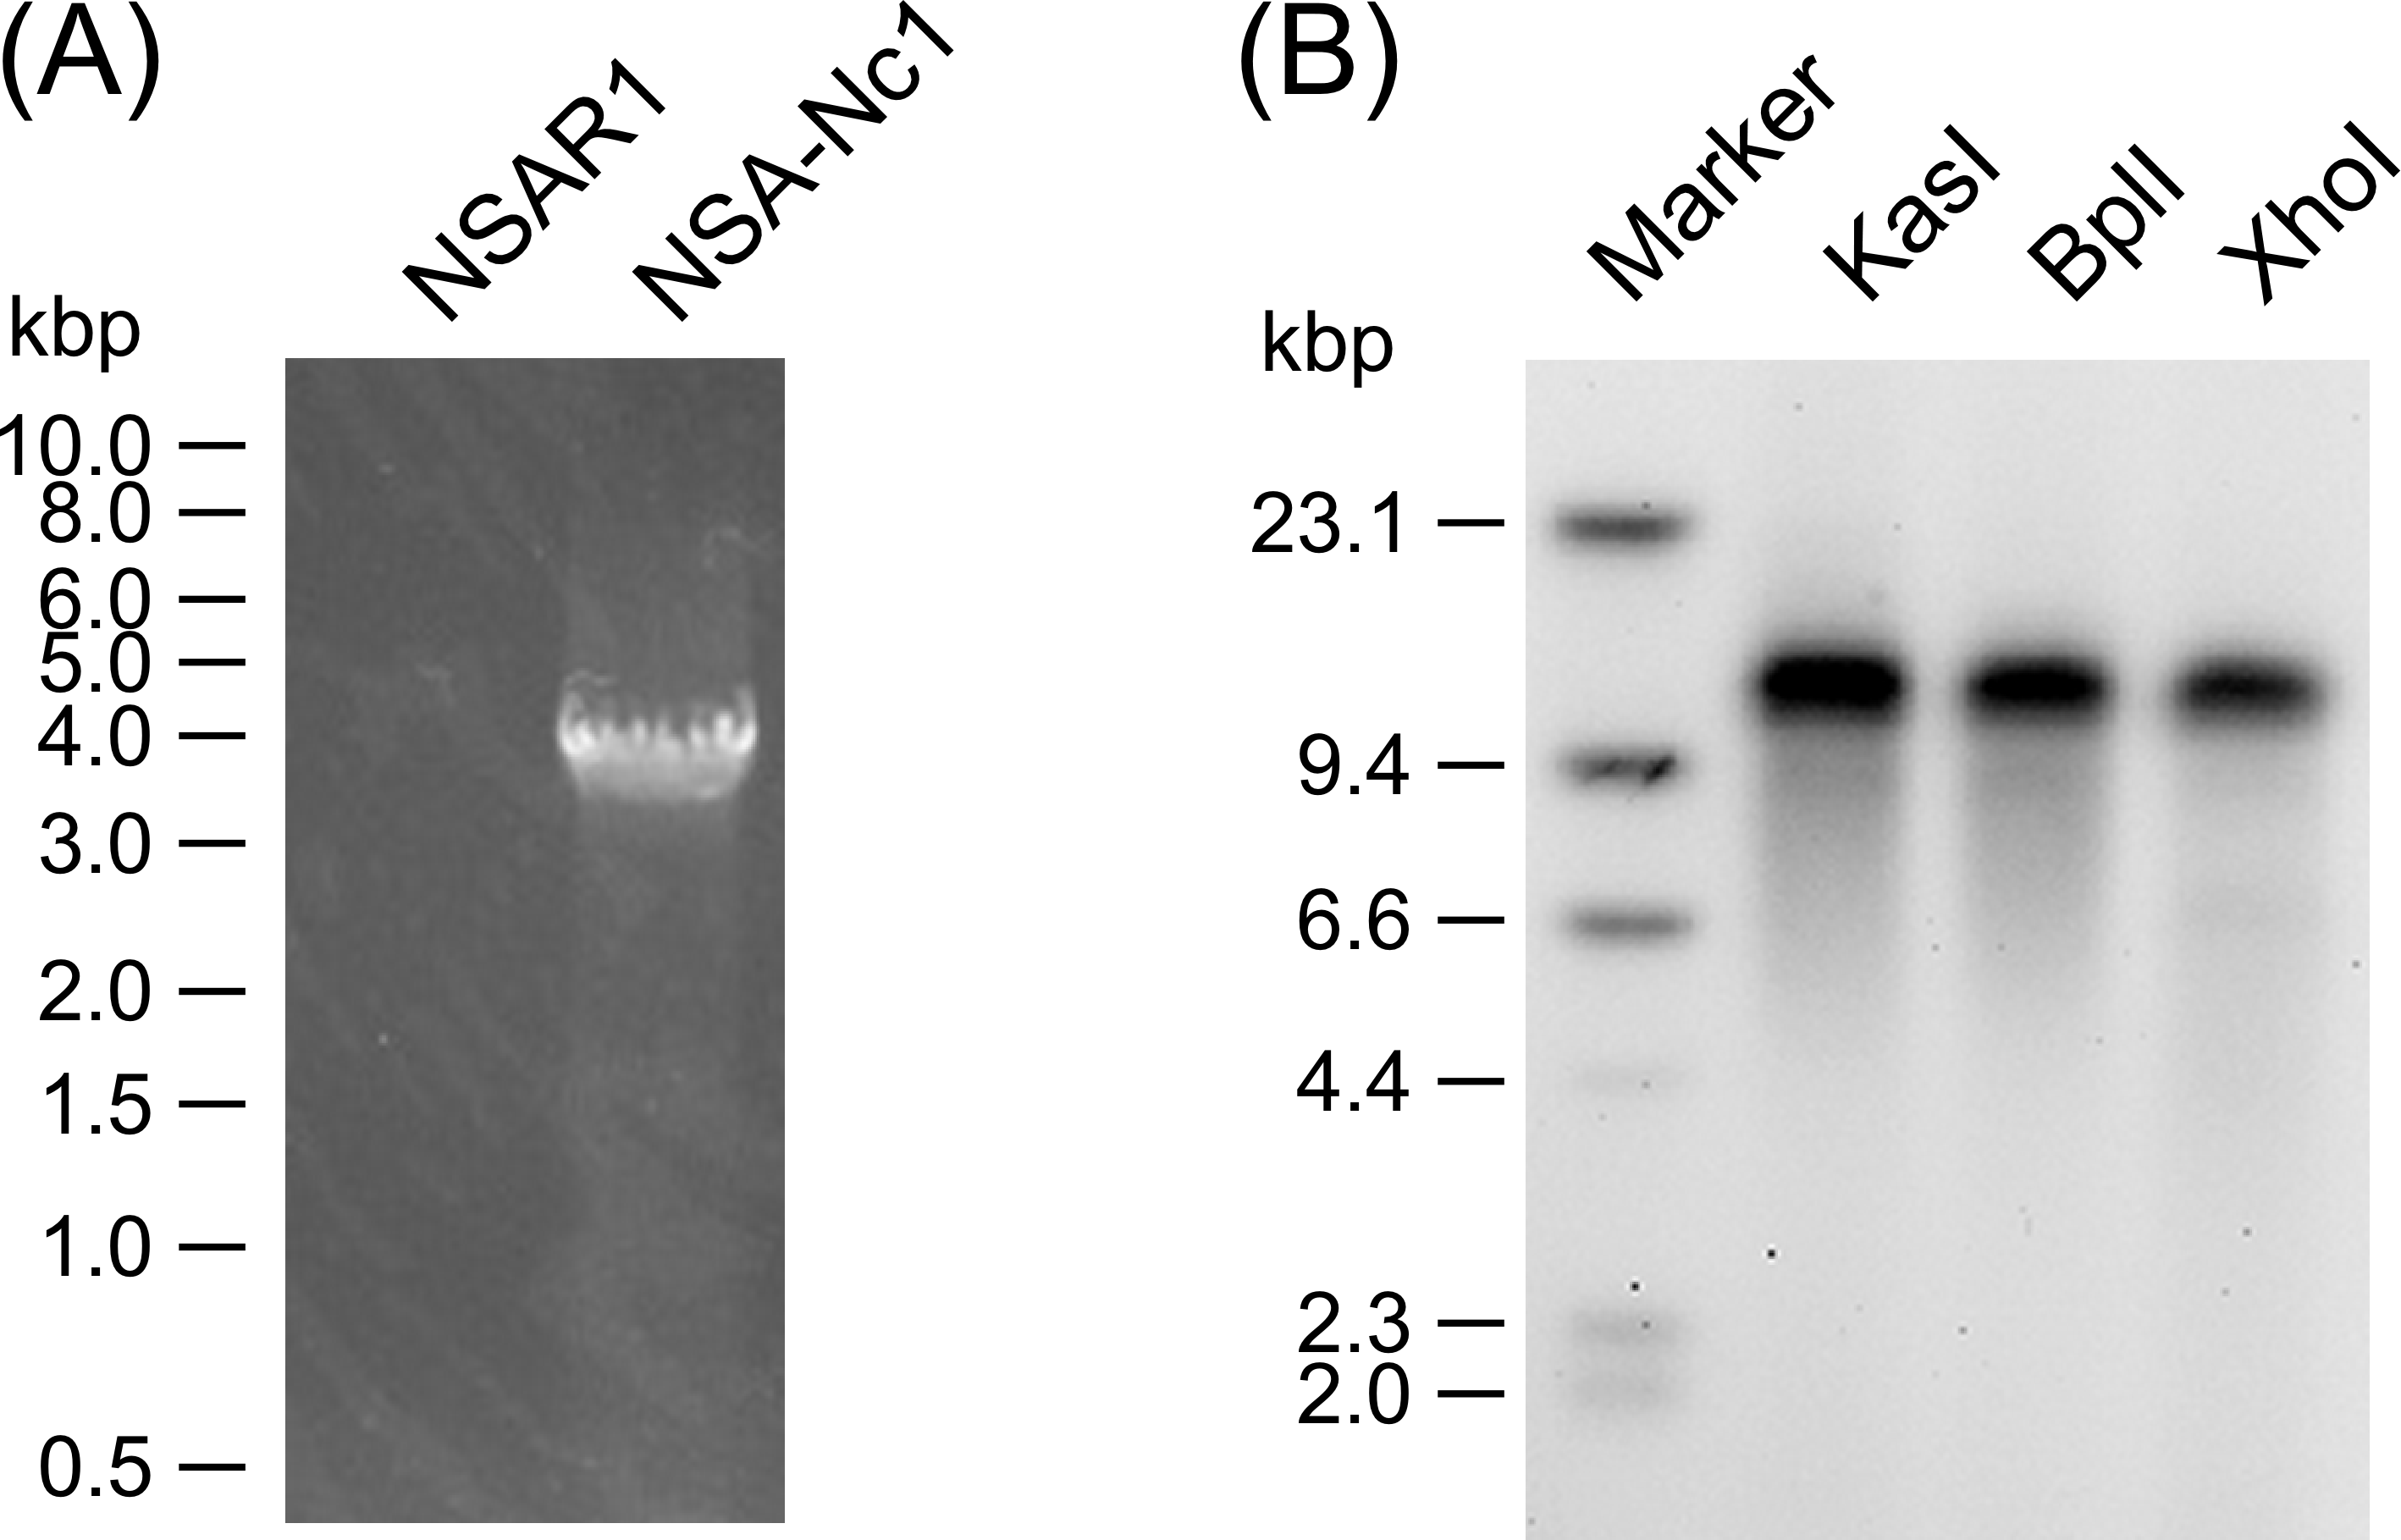


**Figure S1. Analysis of *egt-1* gene integration into the *A. oryzae* NSA-Nc1 strain*.***

**(A)** Integration of the *Ncegt-1* gene was checked by PCR with genomic DNA of the NSA-Nc1 strain and the same primers used for gene cloning. The amplicon size was estimated at 3.5 kbp. **(B)** Southern blot analysis was carried out using the DIG system (Roche Diagnostics GmbH, Mannheim, Germany) according to the manufacturer’s protocol. A DIG labeled-probe (3.5 kbp) was prepared by PCR with the pUARA2-Nc1 plasmid as a template and the same primers used for gene cloning. Genomic DNA digested with *Kas*I, *Bpl*I, or *Xho*I, which have unique restriction sites in pUARA2-Nc1, was electrophoresed on a 0.5% agarose gel, blotted and then detected with the probe.


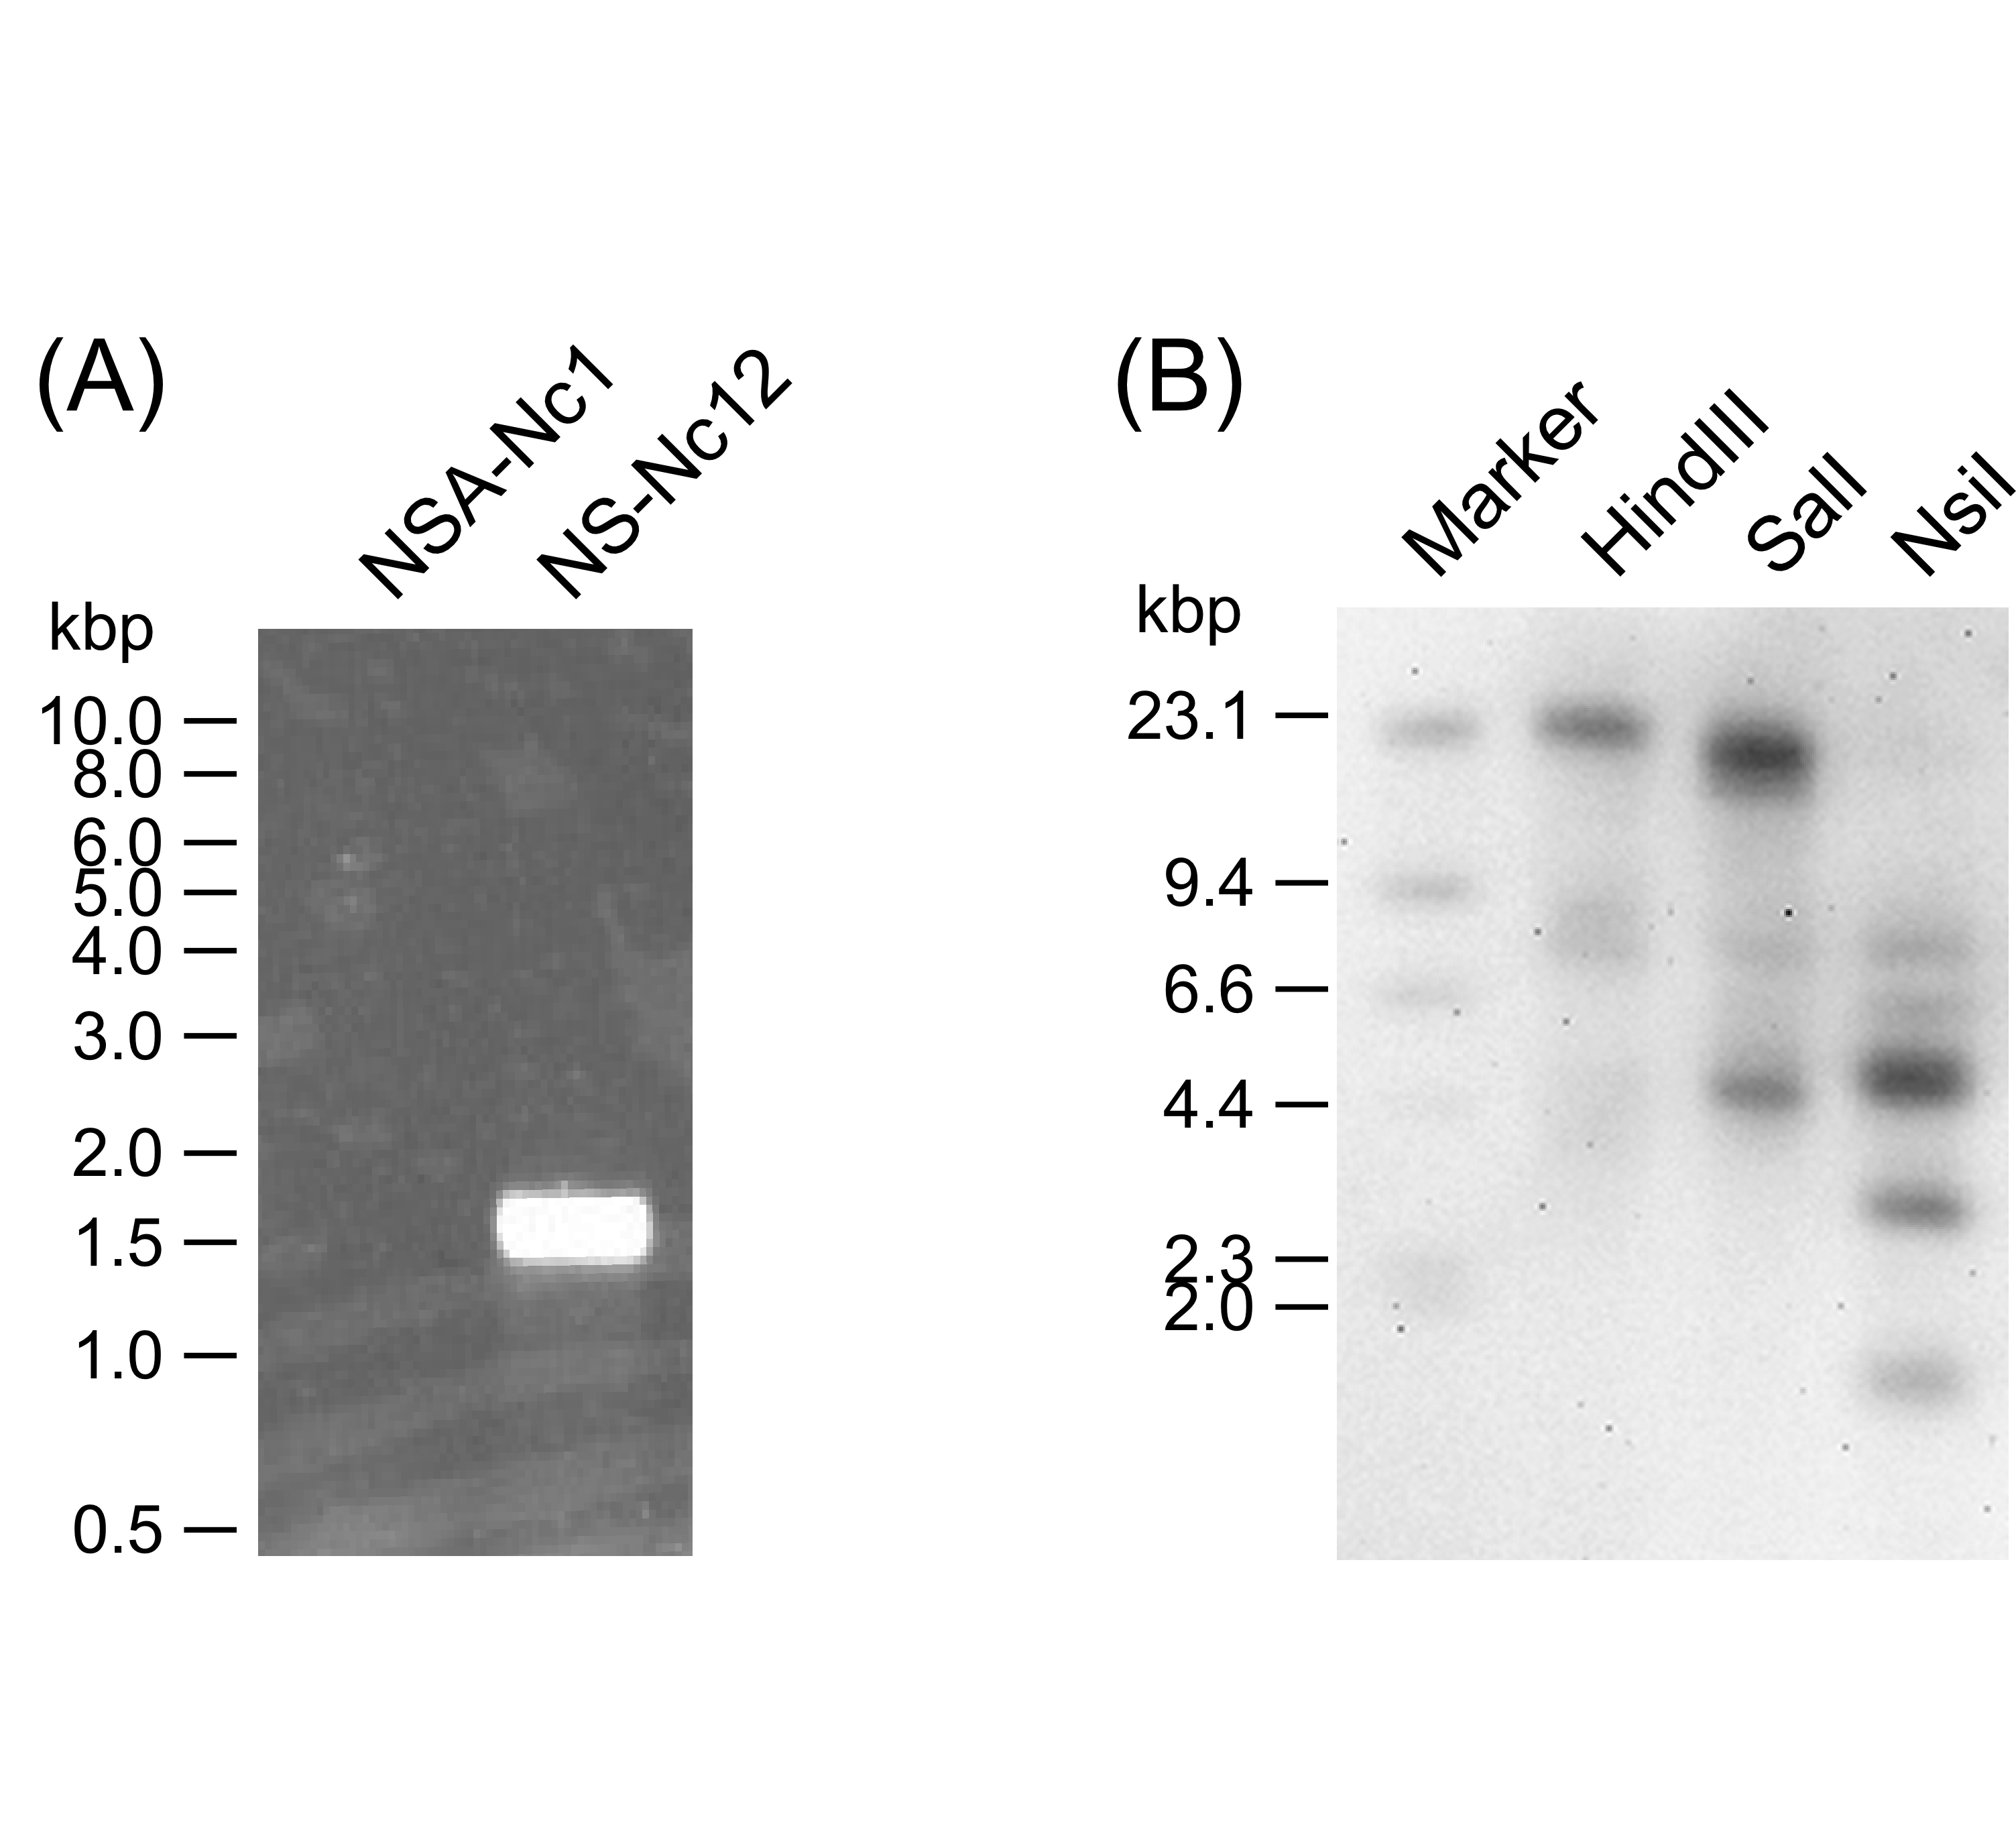


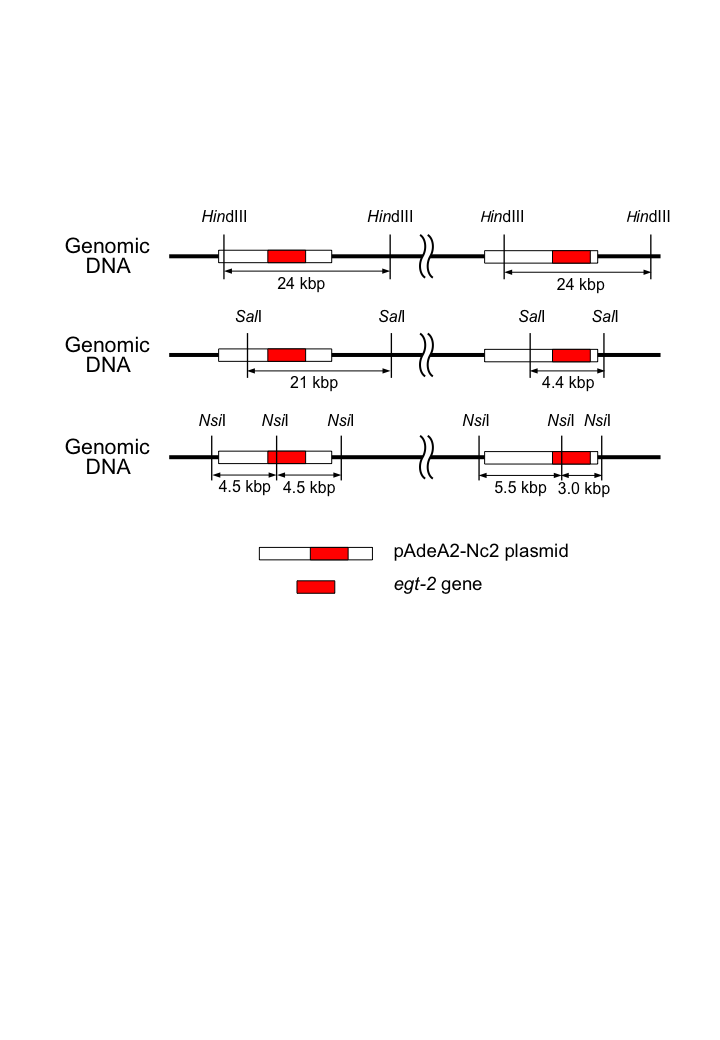
(C)

**Figure S2. Analysis of *egt-2* gene integration into the *A. oryzae* NS-Nc12 strain*.***

**(A)** Integration of the *Ncegt-2* gene was checked by PCR with genomic DNA of the NS-Nc12 strain and the same primers used for gene cloning. The amplicon size was estimated at 1.5 kbp. **(B)** Southern blot analysis was carried out using the DIG system. A DIG labeled-probe (1.5 kbp) was prepared by PCR with the pAdeA2-Nc2 plasmid as a template and the same primers used for gene cloning. Genomic DNA digested with *Hin*dIII, *Sal*I, or *Nsi*I, which have unique restriction sites in pAdeA2-Nc2, was electrophoresed on a 0.5% agarose gel, blotted and then detected with the probe. **(C)** Because random integrations are usually dominant rather than homologous recombination in fungi 18), the locus used for the integration was also suggested to be random. Therefore, possiblerestriction enzyme recognition sites in genomic DNA of the transformed NS-Nc12 strain were schematically shown based on the result of Southern blot analysis.
